# Supplementary material
Source: Preprints.org preprint supplement (doi:10.20944/preprints202103.0334.v1)
Supplement: Supplementary file 1 [file Table%201.pdf]

Table 1. Various related gene sequences

| Name          | sequences                                                   |
|---------------|-------------------------------------------------------------|
| GAPDH         | FOR: TGCTGATATGTCGTGGAG<br>REV: GTCTTCTGAGTGGCAGTGAT        |
| PI3K          | FOR: AGCTGAGCGTGTGTGACAGTAT<br>REV: CCGAACATACGATTGGGTTAGTT |
| IL-1 $\beta$  | FOR: GCACATCGCTCAGCAAATCG<br>REV: ACAACTCCCAGGCTCCAGAC      |
| TNF- $\alpha$ | FOR: CCCAGGGAGGAGCAATACAG<br>REV: GGGAGGACGCCATAACAAC       |
