# Supplementary material
Source: Preprints.org preprint supplement (doi:10.20944/preprints202103.0334.v1)
Supplement: Supplementary file 2 [file Table%202.pdf]

**Table 2. Relative expression of autophagy-related proteins in rats (  $\bar{x}\pm s, \mu\text{g/ml}$  )**

| Group          | Beclin-1                 | LC3                      | p62                      |
|----------------|--------------------------|--------------------------|--------------------------|
| Control        | 0.71±0.12                | 0.23±0.04                | 3.84±0.14                |
| OGD            | 1.72±0.21 <sup>###</sup> | 1.96±0.08 <sup>###</sup> | 0.96±0.04 <sup>***</sup> |
| OGD+Met5μg/ml  | 1.55±0.23 <sup>**</sup>  | 1.91±0.16 <sup>*</sup>   | 2.58±0.10 <sup>*</sup>   |
| OGD+Met10μg/ml | 1.16±0.20 <sup>**</sup>  | 1.34±0.15 <sup>**</sup>  | 2.96±0.16 <sup>*</sup>   |
| OGD+Met20μg/ml | 0.99±0.09 <sup>**</sup>  | 1.11±0.13 <sup>***</sup> | 3.66±0.14 <sup>###</sup> |
